# Supplementary material
Source: PubMed Central journal article supplement (PMC6309500)
Supplement: NIHMS1509539-supplement-4.pdf [file NIHMS1509539-supplement-4.pdf]

## Supplemental Videos

**Video S1. Related to Figures 3, 4 and 7F. Allosteric inhibition of SIRT1 by the combined actions of DBC1 and PACS-2.**

**Video S2. Related to Figures 5, 7E and 7F. STACs protect SIRT1 from PACS-2 by stabilizing the 3HB.**
